# Supplementary material for: Are Gamers Prone to eThrombosis during Long Gaming Sessions?
Source: MDPI journal article supplement (doi:10.3390/life14040525), 2024-04-18
Supplement: s1 [file s1]

**Supplementary Table S1. Characteristics of the participants.**

|                   | <b>Age</b>         | <b>Height (cm)</b>  | <b>Weight (kg)</b> | <b>BMI</b>         | <b>WC (cm)</b>     |
|-------------------|--------------------|---------------------|--------------------|--------------------|--------------------|
| <b>Gamer 1</b>    | 24.5               | 180.5               | 66.5               | 20.4               | 77                 |
| <b>Gamer 2</b>    | 26.2               | 185                 | 84                 | 24.5               | 91                 |
| <b>Gamer 3</b>    | 29.5               | 189                 | 73.7               | 20.6               | 82                 |
| <b>Gamer 4</b>    | 29.3               | 174.5               | 81.1               | 26.6               | 88                 |
| <b>Gamer 5</b>    | 28.3               | 185                 | 95.3               | 27.8               | 102                |
| <b>Gamer 6</b>    | 23.5               | 186                 | 85.6               | 24.7               | 89                 |
| <b>Gamer 7</b>    | 23.9               | 180                 | 94.1               | 29.0               | 99                 |
| <b>Gamer 8</b>    | 23.7               | 178.5               | 77.6               | 24.4               | 89                 |
| <b>Gamer 9</b>    | 23.3               | 186.5               | 87.5               | 25.2               | 82.5               |
| <b>Median</b>     | <b>24.5</b>        | <b>185</b>          | <b>84</b>          | <b>24.7</b>        | <b>89</b>          |
| <b>Mean (±SD)</b> | <b>25.8 (±2.6)</b> | <b>182.8 (±4.6)</b> | <b>82.8 (±9.3)</b> | <b>24.8 (±2.9)</b> | <b>88.8 (±8.0)</b> |
